# Supplementary material
Source: PubMed Central journal article supplement (PMC10197018)

**SUPPLEMENTAL FIGURE S1 Disease response**

Pretreatment Imaging

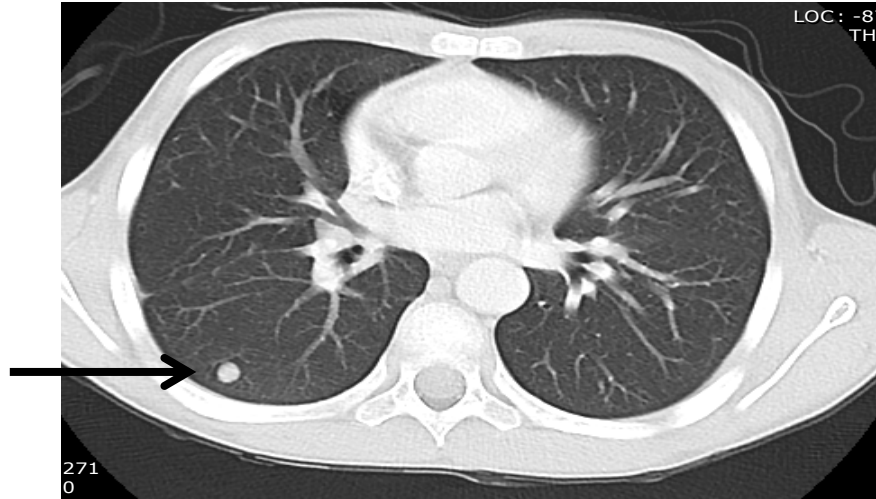

Post Cycle 2 Imaging

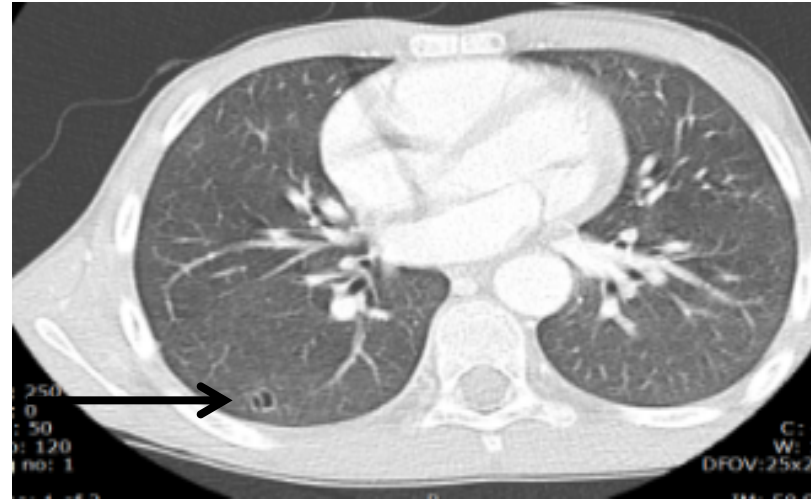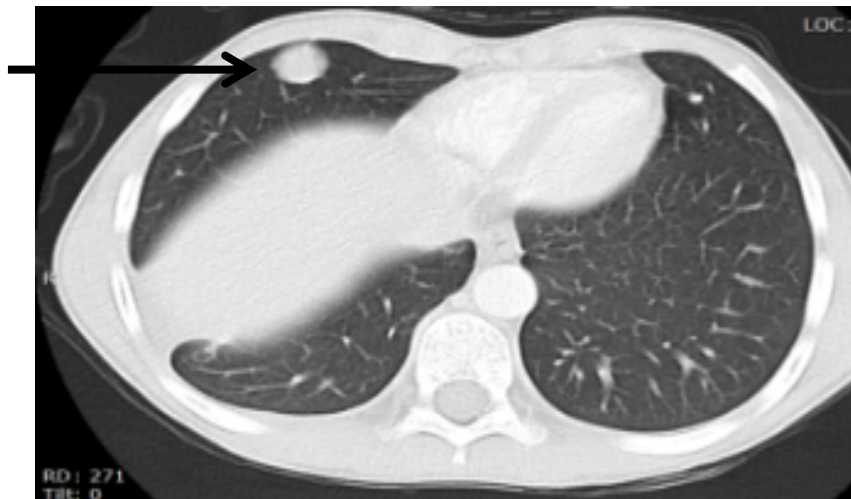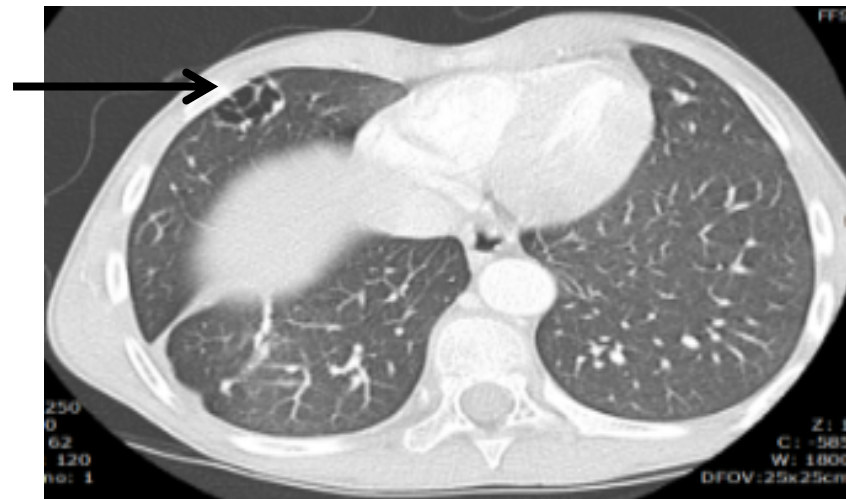

Supplement: NIHMS1885842-supplement-FigS1.pdf [file NIHMS1885842-supplement-FigS1.pdf]
